# Supplementary material for: Light affects tissue patterning of the hypocotyl in the shade-avoidance response
Source: PubMed Central journal article supplement (PMC7153905; doi:10.1371/journal.pgen.1008678), 2020-03-23
Supplement: pgen.1008678.s001.pdf [file pgen.1008678.s001.pdf]

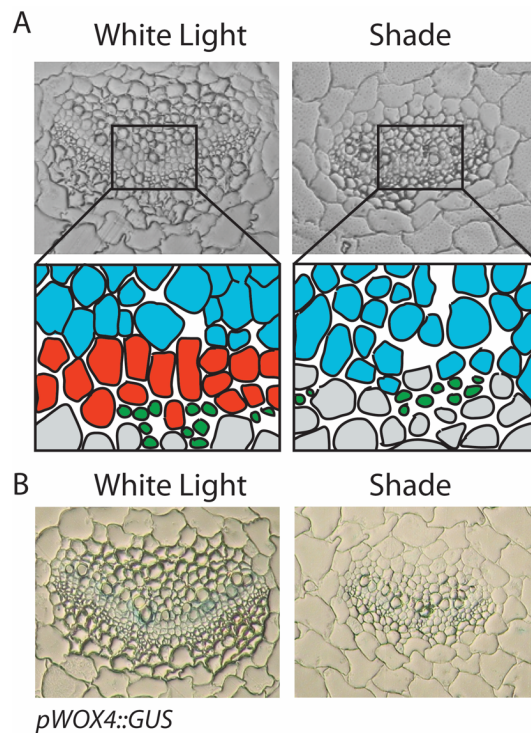

**Figure S1. Shade leads to a reorganization of the vasculature in petioles. A,** Organization of the vasculature in white light (left panel) and in shade (right panel). Upper panel: microscopic image of cross section of petioles, lower panel: cartoon of the boxed area in the cross section. Grey cells: ground tissue; blue cells: xylem; red cells: cambium; green cells: phloem. **B,** Analysis of the cambial marker *WOX4* (pWOX4::GUS) in white light and shade conditions.
