# Supplementary material for: Light affects tissue patterning of the hypocotyl in the shade-avoidance response
Source: PubMed Central journal article supplement (PMC7153905; doi:10.1371/journal.pgen.1008678), 2020-03-23
Supplement: pgen.1008678.s002.pdf [file pgen.1008678.s002.pdf]

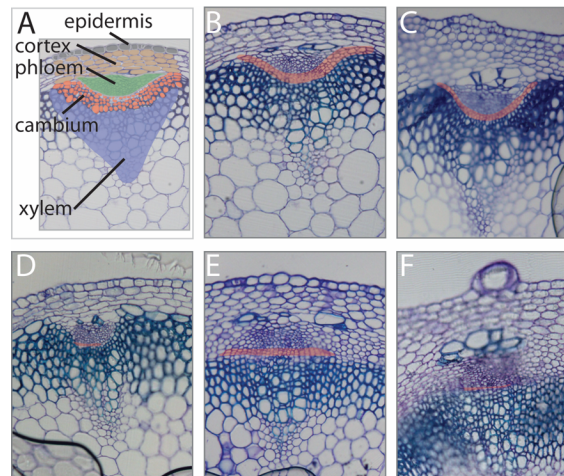

**Figure S2. Histological analysis of the stem base of *rev5* and *wox4* mutant plants.** **A**, Schematic overview of the arrangement of vascular tissue in the Col-0 wild type plant. **B**, Col-0 wild type, **C**, *35S::WOX4*, **D**, *wox4*, **E**, *rev-5*, **F**, *wox4 rev-5* double mutant plants grown in log day conditions. Main stems of plants were sectioned after reaching a minimal height of around 10 cm. Highlighted in red is the cambial cell layer.
