# Supplementary material for: Light affects tissue patterning of the hypocotyl in the shade-avoidance response
Source: PubMed Central journal article supplement (PMC7153905; doi:10.1371/journal.pgen.1008678), 2020-03-23
Supplement: pgen.1008678.s003.pdf [file pgen.1008678.s003.pdf]

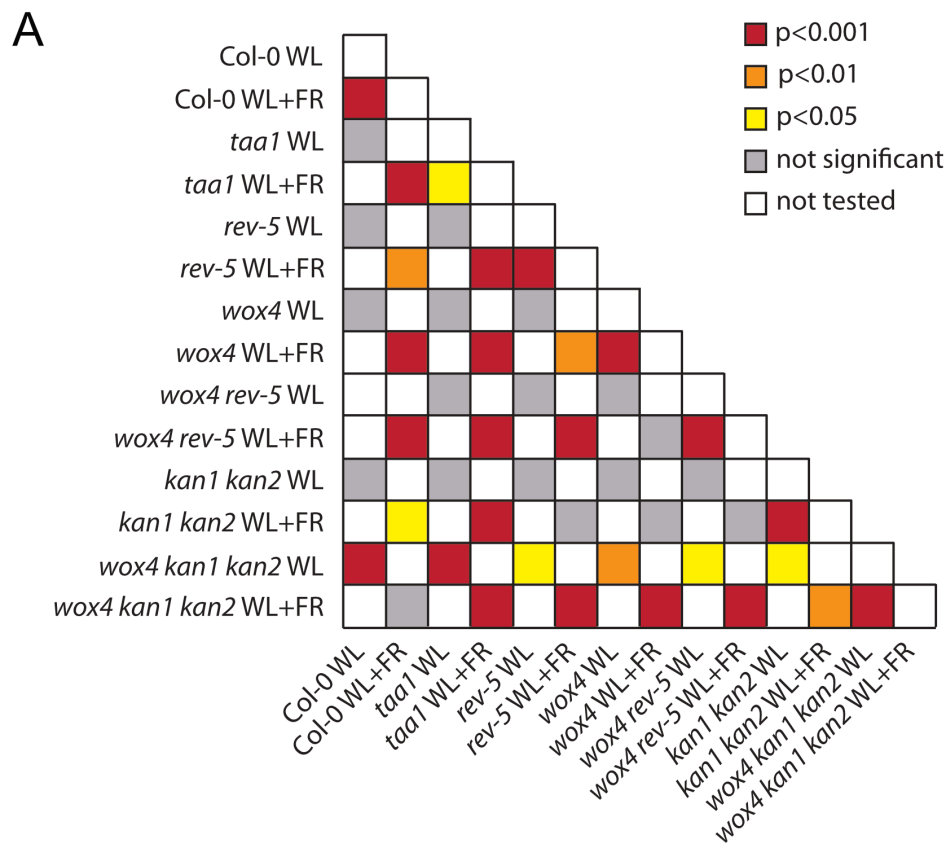

**B**

|            | Df | Sum Sq | Mean Sq | F value | Pr(>F)  |     |
|------------|----|--------|---------|---------|---------|-----|
| geno       | 6  | 22777  | 3796    | 23.109  | <2e-16  | *** |
| treat      | 1  | 60500  | 60500   | 368.289 | <2e-16  | *** |
| geno:treat | 6  | 8072   | 1345    | 8.189   | 3.68e07 | *** |
| residuals  | 96 | 15770  | 164     |         |         |     |

**Supplementary Figure S3. Statistical analysis of shade-induced hypocotyl responses.** **A**, Matrix depicting statistical significance scores using students T-test. Colors represent respective p-values: Red: p < 0.001; orange: p < 0.01; yellow: p < 0.05; grey: not significant; white: not tested. **B**, Two-way ANOVA was carried out to test significance of genotypes, treatments and genotype:treatment interaction. Asterisks plotted by R. The interaction is significant and genotypes responded differently to treatments (ANOVA interaction term p-value < 0.05).
