# Supplementary material for: Light affects tissue patterning of the hypocotyl in the shade-avoidance response
Source: PubMed Central journal article supplement (PMC7153905; doi:10.1371/journal.pgen.1008678), 2020-03-23
Supplement: pgen.1008678.s004.pdf [file pgen.1008678.s004.pdf]

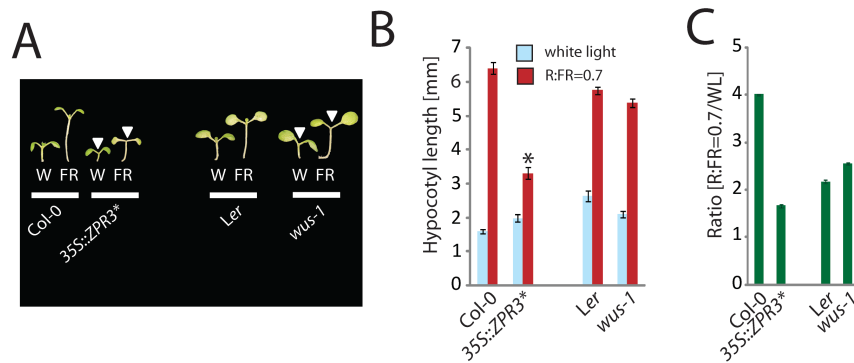

**Figure S4. Shade avoidance responses of mutants lacking a shoot apical meristem.** **A**, Picture of representative seedlings overexpressing the ZPR3 microProtein (*35S::ZPR3*) and showing a meristem arrest phenotype in comparison to Col-0 grown in white light and shade (left panel); and meristem-less *wus-1* mutants and the corresponding Ler wild type grown in white light and shade (right panel). **B**, Quantification of the hypocotyl length. Plotted is the average  $\pm$  SD. **C**, Ratio of the hypocotyl length in shade divided by the length in white light shows the reduced shade response of *35S::ZPR3* seedlings compared to Col-0 and the normal response of *wus-1* compared to Ler.
