# Supplementary material for: Light affects tissue patterning of the hypocotyl in the shade-avoidance response
Source: PubMed Central journal article supplement (PMC7153905; doi:10.1371/journal.pgen.1008678), 2020-03-23
Supplement: pgen.1008678.s005.pdf [file pgen.1008678.s005.pdf]

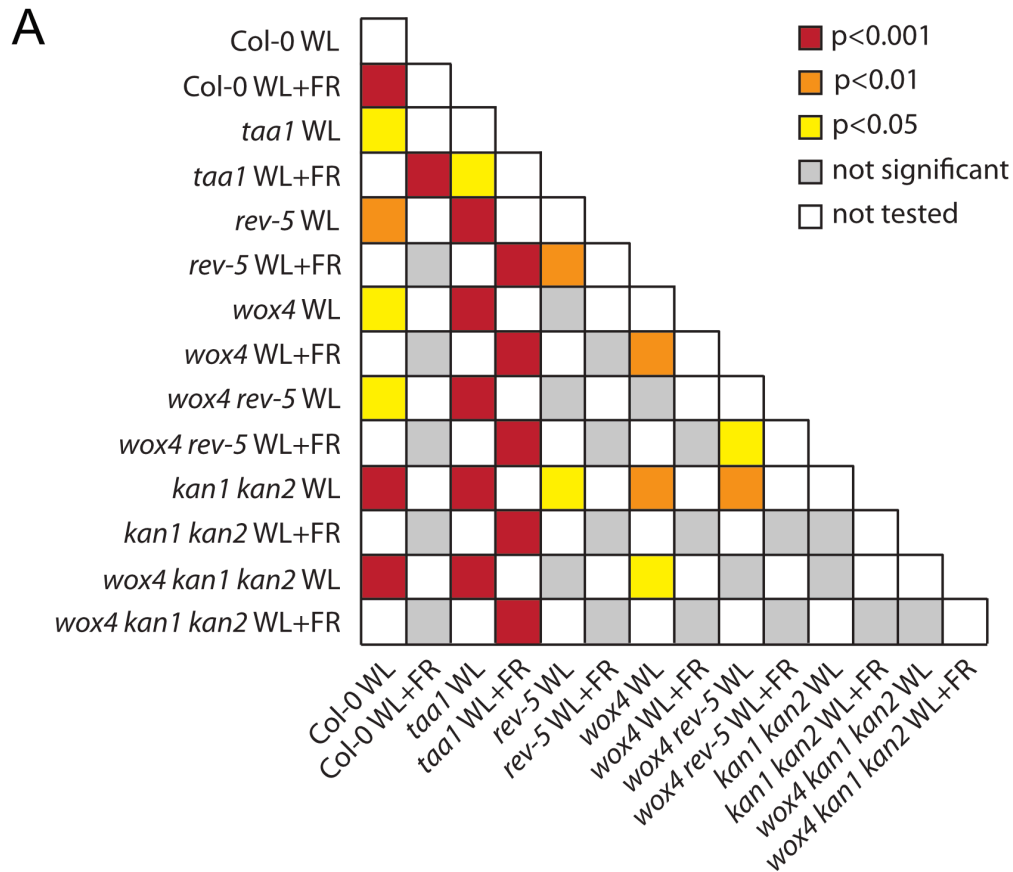

**B**

|            | Df  | Sum sq | Mean Sq | F value | Pr (>F)  |     |
|------------|-----|--------|---------|---------|----------|-----|
| geno       | 6   | 128.61 | 21.43   | 16.102  | 7.67e-14 | *** |
| treat      | 1   | 74.47  | 74.47   | 55.945  | 9.30e-12 | *** |
| geno:treat | 6   | 21.21  | 3.53    | 2.656   | 0.0183   | *   |
| residuals  | 132 | 175.71 | 1.33    |         |          |     |

**Figure S5. Statistical analysis of shade-induced tracheary element (TE) numbers.** **A**, Matrix depicting statistical significance scores using students T-test. Colors represent respective p-values: Red:  $p < 0.001$ ; orange:  $p < 0.01$ ; yellow:  $p < 0.05$ ; grey: not significant; white: not tested. **B**, Two-way ANOVA was carried out to test significance of genotypes, treatments and genotype:treatment interaction. Asterisks plotted by R. The interaction is significant and genotypes responded differently to treatments (ANOVA interaction term p-value  $< 0.05$ ).
