# Supplementary material for: Light affects tissue patterning of the hypocotyl in the shade-avoidance response
Source: PubMed Central journal article supplement (PMC7153905; doi:10.1371/journal.pgen.1008678), 2020-03-23
Supplement: pgen.1008678.s007.pdf [file pgen.1008678.s007.pdf]

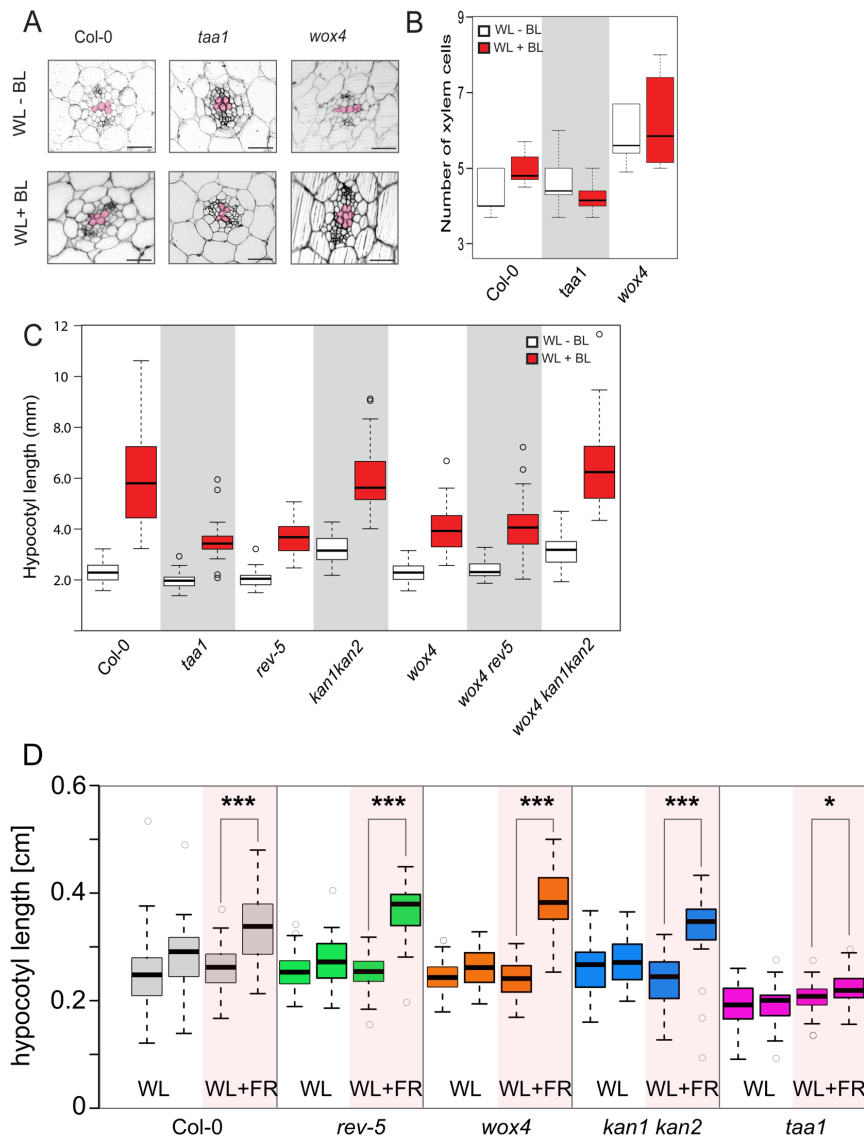

**Supplementary Figure S7. Histological analysis of brassinolide-induced vascular patterning.** **A**, Representative images of hypocotyl cross sections of 10-day old seedlings grown in white light (WL) +/- brassinolide (BL). Pink colored areas mark the TE cells in the center of the vascular cylinder. Scale bars, 20  $\mu$ m. **B**, Box plots show the observed experimental data of TE numbers in WL +/- BL for wild type, *taa1* and *wox4* mutant plants. Shown is one of three biological replicates n=40. **C**, Box plots depicting the hypocotyl length; white boxes hypocotyls grown in WL-BL; red boxes, hypocotyls grown in WL+BL. **D**, 24-hour shade experiment. Plotted are hypocotyl lengths in WL and WL+FR conditions (shaded areas). \* $P < 0.05$ ; \*\*\* $P < 0.0005$ , determined by student's t-test.
