# Supplementary material for: Light affects tissue patterning of the hypocotyl in the shade-avoidance response
Source: PubMed Central journal article supplement (PMC7153905; doi:10.1371/journal.pgen.1008678), 2020-03-23
Supplement: pgen.1008678.s008.pdf [file pgen.1008678.s008.pdf]

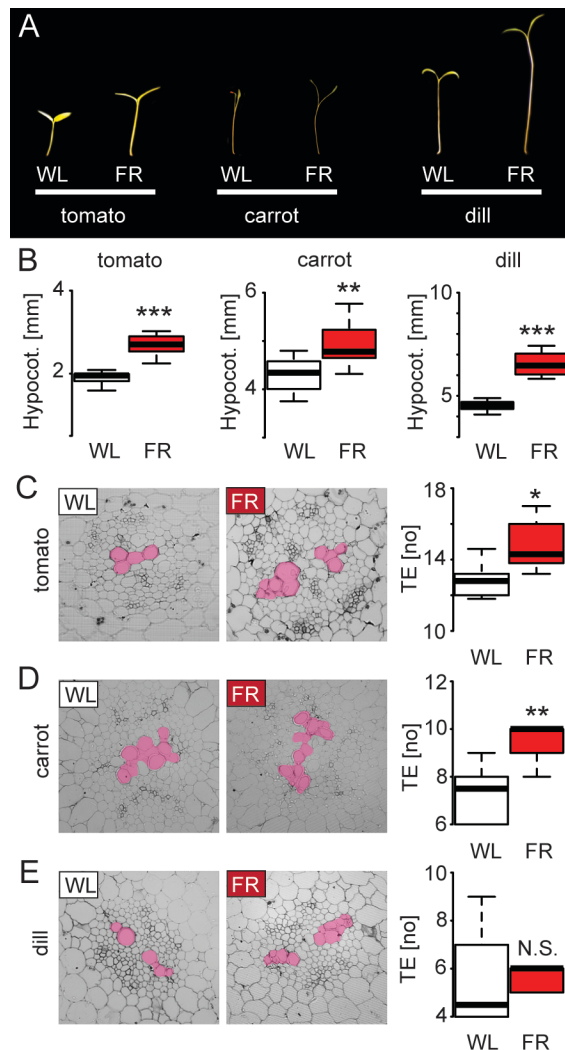

**Supplementary Figure S8. Hypocotyl response to shade in selected crop plants.**

**(A)** Picture of representative seedlings grown in WL and WL+FR conditions.

**(B)** Quantification of the hypocotyl length of seedlings grown in WL and WL+FR conditions.

**(C-E)** Representative images of hypocotyl cross sections of 10-day old C, tomato, (D) carrot and

**(E)** dill seedlings grown in white light (WL) and shade (W+FR) conditions. Box plots show the observed experimental data of TE numbers. T-Tests \* $p \leq 0.05$ , \*\*  $p \leq 0.005$ , \*\*\*  $p \leq 0.001$ .
