# Supplementary material for: Light affects tissue patterning of the hypocotyl in the shade-avoidance response
Source: PubMed Central journal article supplement (PMC7153905; doi:10.1371/journal.pgen.1008678), 2020-03-23
Supplement: pgen.1008678.s009.pdf [file pgen.1008678.s009.pdf]

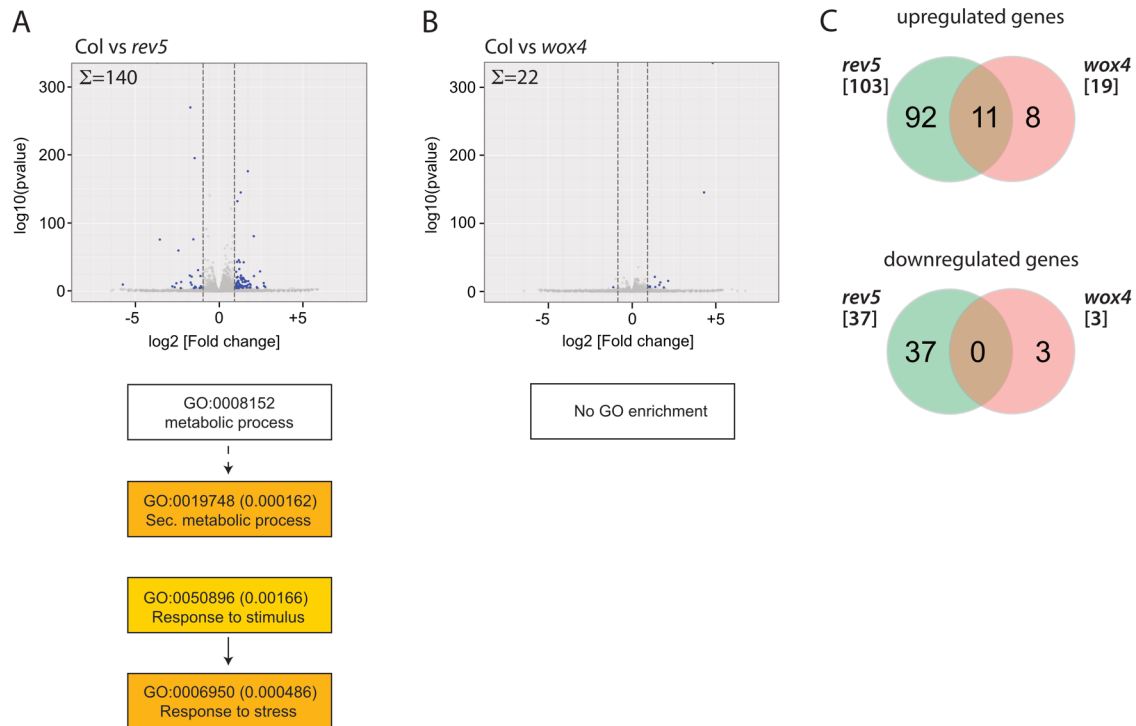

**Supplementary Figure S9. Identification of differentially expressed genes in *rev5*, *wox4* and *wox4 rev5* mutant plants.**

**(A)** top: Volcano plot showing differentially expressed genes in *rev5* compared to the Col-0 wild type. Bottom: gene ontology analysis using the agrigo tool showing that genes related to secondary metabolism and stress responses are over-represented.

**(B)** Volcano plot of *wox4* mutants compared to wild type; no GO enrichment was observed.

**(C)** Venn diagram showing the overlap of the transcriptome analysis ( $\log_2FC > +1/-1$ ; BH-adj p-value  $< 0.001$ ).
