# Supplementary material for: Light affects tissue patterning of the hypocotyl in the shade-avoidance response
Source: PubMed Central journal article supplement (PMC7153905; doi:10.1371/journal.pgen.1008678), 2020-03-23
Supplement: pgen.1008678.s010.pdf [file pgen.1008678.s010.pdf]

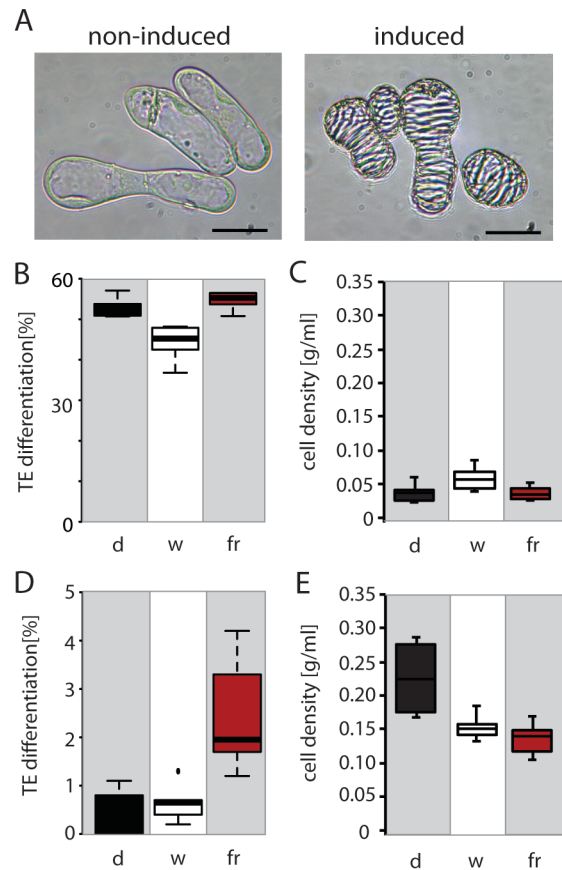

**Supplementary Figure S10. Trans-differentiation of TEs *in vitro*.**

**(A)** Images of habituated cell culture cells in the non-differentiated state and TE differentiated cells after hormonal induction. Scale bars = 12 $\mu$ m.

**(B)** Analysis of TE differentiation efficiency in different light qualities.

**(C)** Determination of the cell density in induced conditions for different light regimes.

**(D)** Analysis of spontaneous TE differentiation in different light conditions.

**(E)** Determination of the cell density of cells grown in different light regimes in the absence of inducing hormones. d = dark, w = white light, fr = white light supplemented with far-red light. (n=4 replicates of 1-2 experiments).
